# Supplementary material for: Blood-based extracellular matrix biomarkers are correlated with clinical outcome after PD-1 inhibition in patients with metastatic melanoma
Source: PubMed Central journal article supplement — J Immunother Cancer. 2020 Oct 22;8(2):e001193. doi: 10.1136/jitc-2020-001193 (PMC7583811; doi:10.1136/jitc-2020-001193), 2020-10-22
Supplement: jitc-2020-001193supp001.pdf [file jitc-2020-001193supp001.pdf]

**Suppl. Table 1** Correlation matrix showing the association of ECM biomarkers and lactate dehydrogenase (LDH) at baseline.

|               |                     |            |             |               |             |            |             |            |
|---------------|---------------------|------------|-------------|---------------|-------------|------------|-------------|------------|
| <b>LDH</b>    | Pearson Correlation | -0.03      |             |               |             |            |             |            |
|               | Sig. (2-tailed)     | 0.743      |             |               |             |            |             |            |
|               | N                   | 107        |             |               |             |            |             |            |
| <b>PRO-C3</b> | Pearson Correlation | 0.03       | 0.56        |               |             |            |             |            |
|               | Sig. (2-tailed)     | 0.724      | <0.0001**** |               |             |            |             |            |
|               | N                   | 107        | 107         |               |             |            |             |            |
| <b>PC3X</b>   | Pearson Correlation | -0.06      | 0.41        | 0.60          |             |            |             |            |
|               | Sig. (2-tailed)     | 0.532      | <0.0001**** | <0.0001****   |             |            |             |            |
|               | N                   | 107        | 107         | 107           |             |            |             |            |
| <b>C4G</b>    | Pearson Correlation | -0.03      | -0.11       | -0.07         | 0.04        |            |             |            |
|               | Sig. (2-tailed)     | 0.757      | 0.279       | 0.479         | 0.699       |            |             |            |
|               | N                   | 106        | 106         | 106           | 106         |            |             |            |
| <b>C3M</b>    | Pearson Correlation | 0.05       | 0.06        | 0.11          | 0.27        | 0.22       |             |            |
|               | Sig. (2-tailed)     | 0.642      | 0.514       | 0.277         | 0.005**     | 0.027*     |             |            |
|               | N                   | 107        | 107         | 107           | 107         | 106        |             |            |
| <b>C4M</b>    | Pearson Correlation | 0.11       | 0.18        | 0.11          | 0.28        | 0.06       | 0.86        |            |
|               | Sig. (2-tailed)     | 0.274      | 0.060       | 0.257         | 0.003**     | 0.524      | <0.0001**** |            |
|               | N                   | 107        | 107         | 107           | 107         | 106        | 107         |            |
| <b>VICM</b>   | Pearson Correlation | 0.03       | -0.13       | -0.04         | 0.18        | 0.01       | 0.21        | 0.26       |
|               | Sig. (2-tailed)     | 0.730      | 0.176       | 0.700         | 0.069       | 0.928      | 0.034*      | 0.006**    |
|               | N                   | 107        | 107         | 107           | 107         | 106        | 107         | 107        |
|               |                     | <b>Age</b> | <b>LDH</b>  | <b>PRO-C3</b> | <b>PC3X</b> | <b>C4G</b> | <b>C3M</b>  | <b>C4M</b> |

Pearson correlation. Abbreviations: significance (sig.), number (N).

**Suppl. Table 2** Hazard ratios of the effects of nivolumab versus pembrolizumab in terms of progression-free survival (PFS) and overall survival (OS) by ECM biomarkers divided in low (Q1-Q3) and high (Q4) subgroups

| Factor | Test variable         | PFS                 |                            |         | OS                  |                            |         |
|--------|-----------------------|---------------------|----------------------------|---------|---------------------|----------------------------|---------|
|        |                       | Events /total cases | Nivo vs Pembro HR (95% CI) | P-value | Events /total cases | Nivo vs Pembro HR (95% CI) | P-value |
| PRO-C3 | 4.0-12.5 ng/ml, Q1-Q3 | 45/79               | 0.67 (0.36-1.24)           | 0.206   | 25/80               | 0.99 (0.44-2.22)           | 0.974   |
|        | 12.6-84.7 ng/ml, Q4   | 21/27               | 0.48 (0.20-1.15)           | 0.099   | 15/27               | 0.34 (0.12-1.01)           | 0.053   |
| PC3X   | 1.2-7.6 ng/ml, Q1-Q3  | 44/79               | 0.51 (0.27-0.96)           | 0.038*  | 26/80               | 0.60 (0.26-1.37)           | 0.224   |
|        | 7.6-30.2 ng/ml, Q4    | 22/27               | 0.99 (0.43-2.28)           | 0.974   | 14/27               | 0.85 (0.30-2.43)           | 0.765   |
| C4G    | 7.8-27.3 ng/ml, Q1-Q3 | 44/79               | 0.88 (0.48-1.61)           | 0.686   | 31/80               | 0.74 (0.36-1.53)           | 0.416   |
|        | 27.4-125.7 ng/ml, Q4  | 21/26               | 0.48 (0.11-2.08)           | 0.324   | 8/26                | 0.65 (0.08-5.28)           | 0.686   |
| C3M    | 8.2-19.5 ng/ml, Q1-Q3 | 45/79               | 0.74 (0.40-1.35)           | 0.321   | 29/80               | 0.79 (0.38-1.66)           | 0.533   |
|        | 19.6-36.0 ng/ml, Q4   | 21/27               | 0.48 (0.18-1.27)           | 0.137   | 11/27               | 0.61 (0.16-2.36)           | 0.471   |
| C4M    | 8.8-38.0 ng/ml, Q1-Q3 | 47/79               | 0.73 (0.41-1.33)           | 0.306   | 29/80               | 0.77 (0.36-1.64)           | 0.492   |
|        | 38.8-87.1 ng/ml, Q4   | 19/27               | 0.48 (0.18-1.26)           | 0.138   | 11/27               | 0.63 (0.18-2.16)           | 0.457   |
| VICM   | 1.0-23.4 ng/ml, Q1-Q3 | 48/79               | 0.64 (0.36-1.16)           | 0.141   | 30/79               | 0.74 (0.35-1.57)           | 0.433   |
|        | 23.7-132.3 ng/ml, Q4  | 18/27               | 0.70 (0.25-1.99)           | 0.513   | 10/28               | 0.67 (0.17-2.61)           | 0.566   |

HR were calculated by univariate Cox regression analysis. Abbreviations: 95% confidence interval (95% CI), hazard ratio (HR). Significance is marked with stars.

**Suppl. Table 3** Correlation matrix showing the association of baseline and week six measurements of the ECM biomarkers

|                     | <b>PRO-C3</b> | <b>PC3X</b> | <b>C4G</b>  | <b>C3M</b>  | <b>C4M</b>  | <b>VICM</b> |
|---------------------|---------------|-------------|-------------|-------------|-------------|-------------|
| Pearson Correlation | 0.68          | 0.67        | 0.83        | 0.72        | 0.70        | 0.45        |
| Sig. (2-tailed)     | <0.0001****   | <0.0001**** | <0.0001**** | <0.0001**** | <0.0001**** | <0.0001**** |
| N                   | 94            | 94          | 93          | 94          | 94          | 94          |

Pearson correlation was used. Abbreviations: Sig significance (sig.), number (N).
