# Supplementary figures and images for: Blood-based extracellular matrix biomarkers are correlated with clinical outcome after PD-1 inhibition in patients with metastatic melanoma
Source: PubMed Central journal article supplement — J Immunother Cancer. 2020 Oct 22;8(2):e001193. doi: 10.1136/jitc-2020-001193 (PMC7583811; doi:10.1136/jitc-2020-001193), 2020-10-22

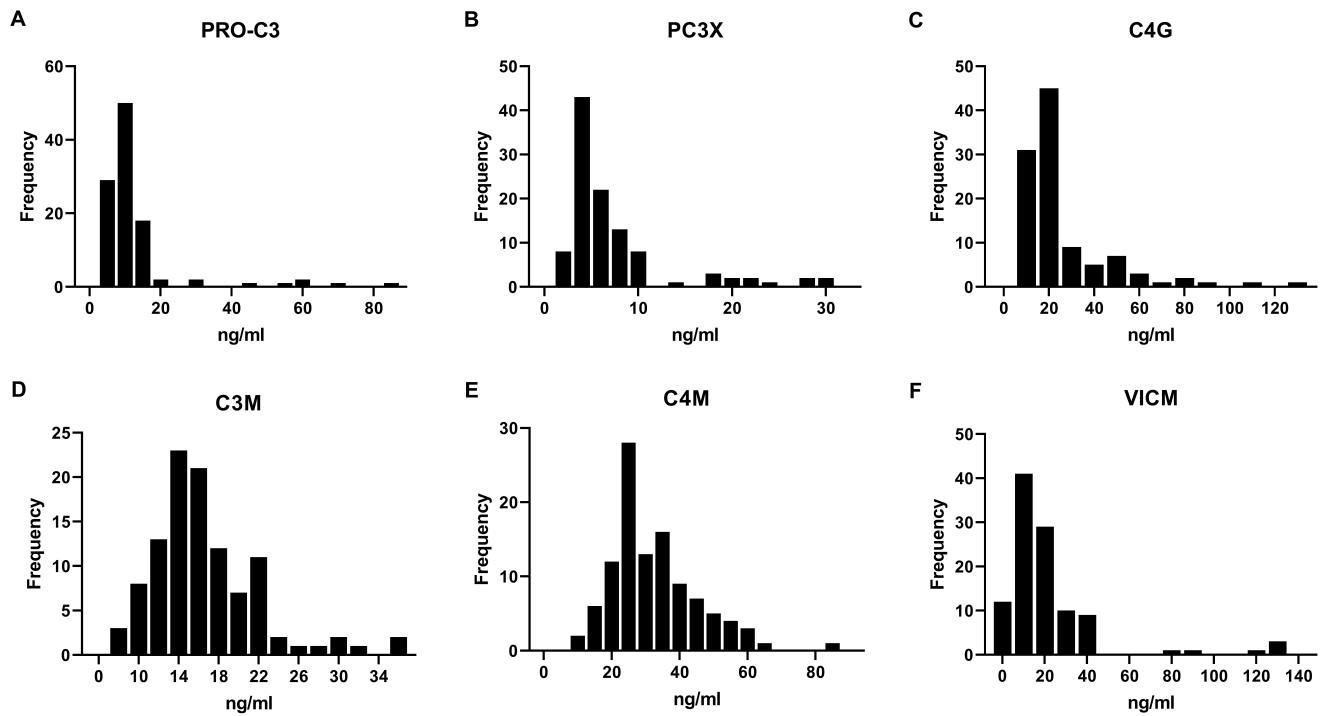

Supplement: jitc-2020-001193supp002.pdf [file jitc-2020-001193supp002.pdf]

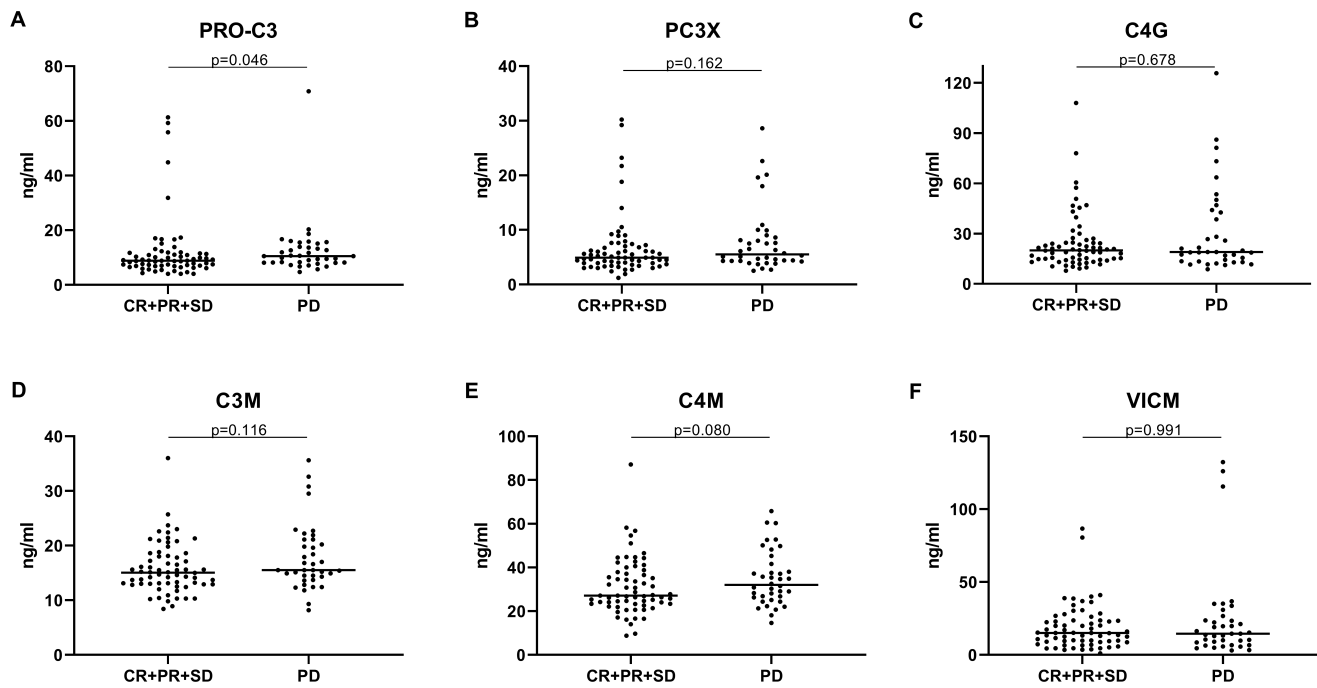

Supplement: jitc-2020-001193supp003.pdf [file jitc-2020-001193supp003.pdf]

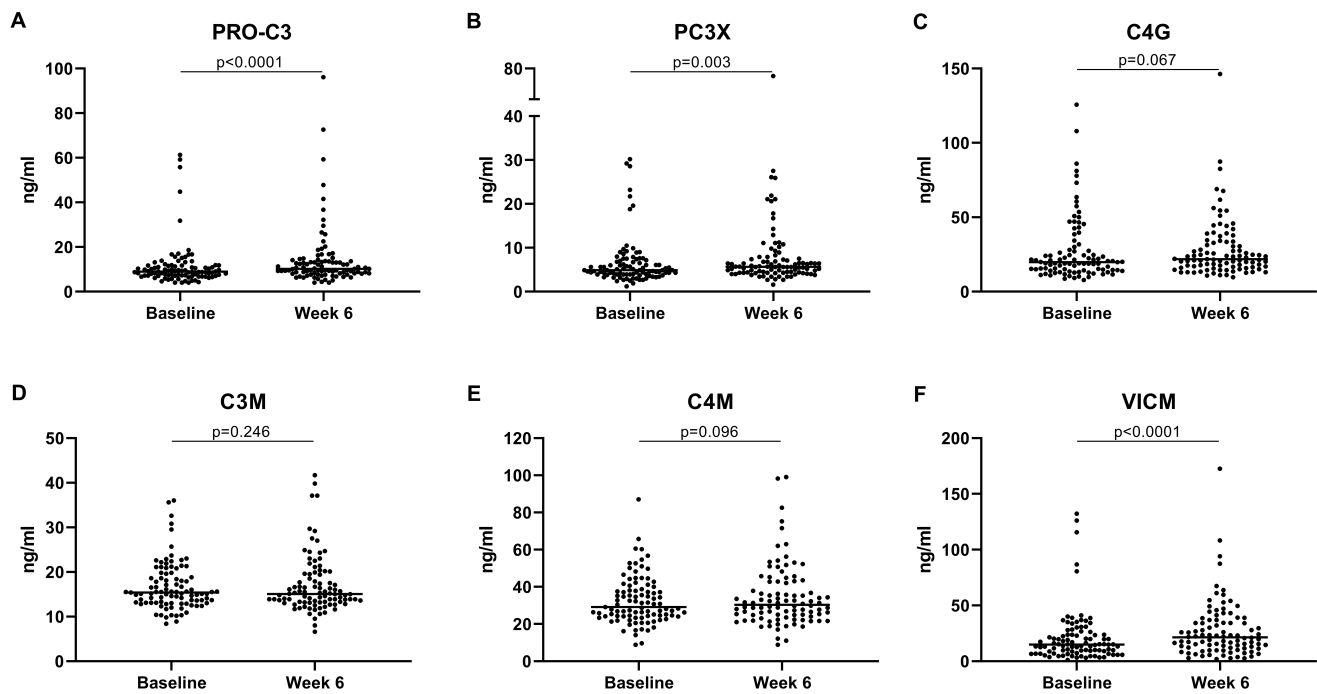

Supplement: jitc-2020-001193supp004.pdf [file jitc-2020-001193supp004.pdf]

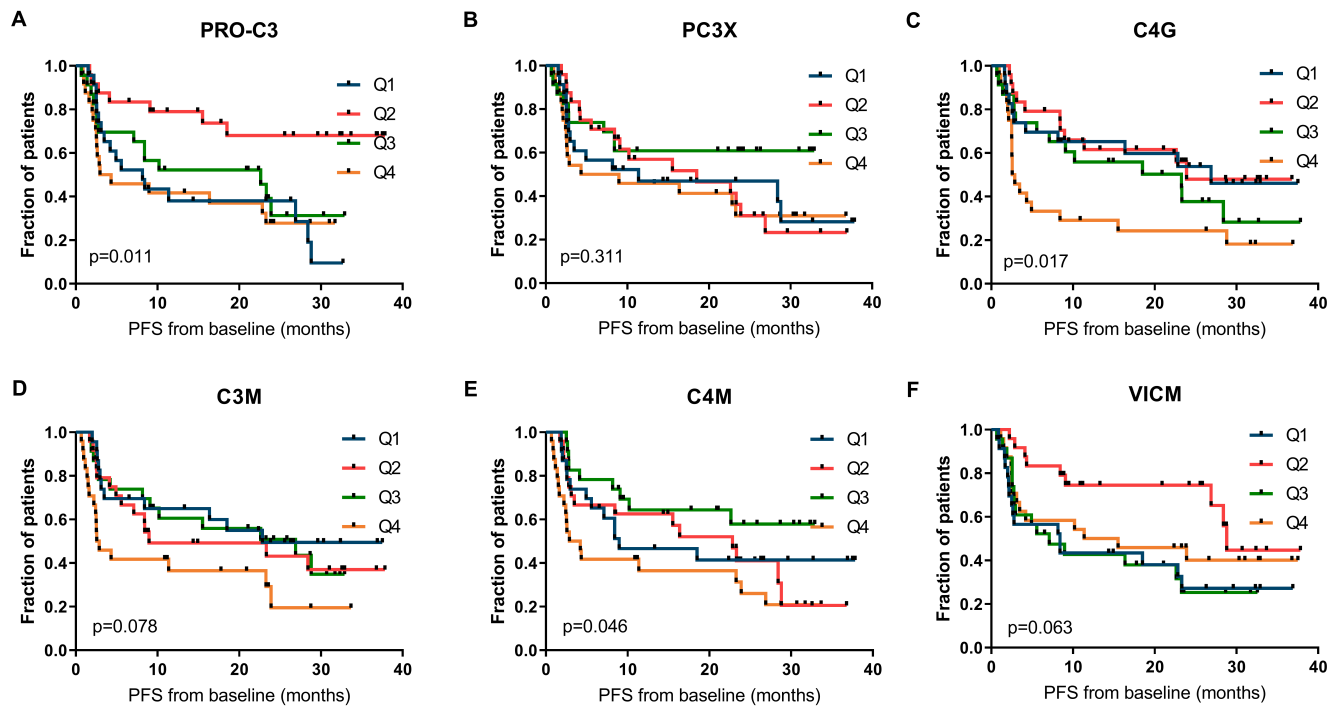

Supplement: jitc-2020-001193supp005.pdf [file jitc-2020-001193supp005.pdf]

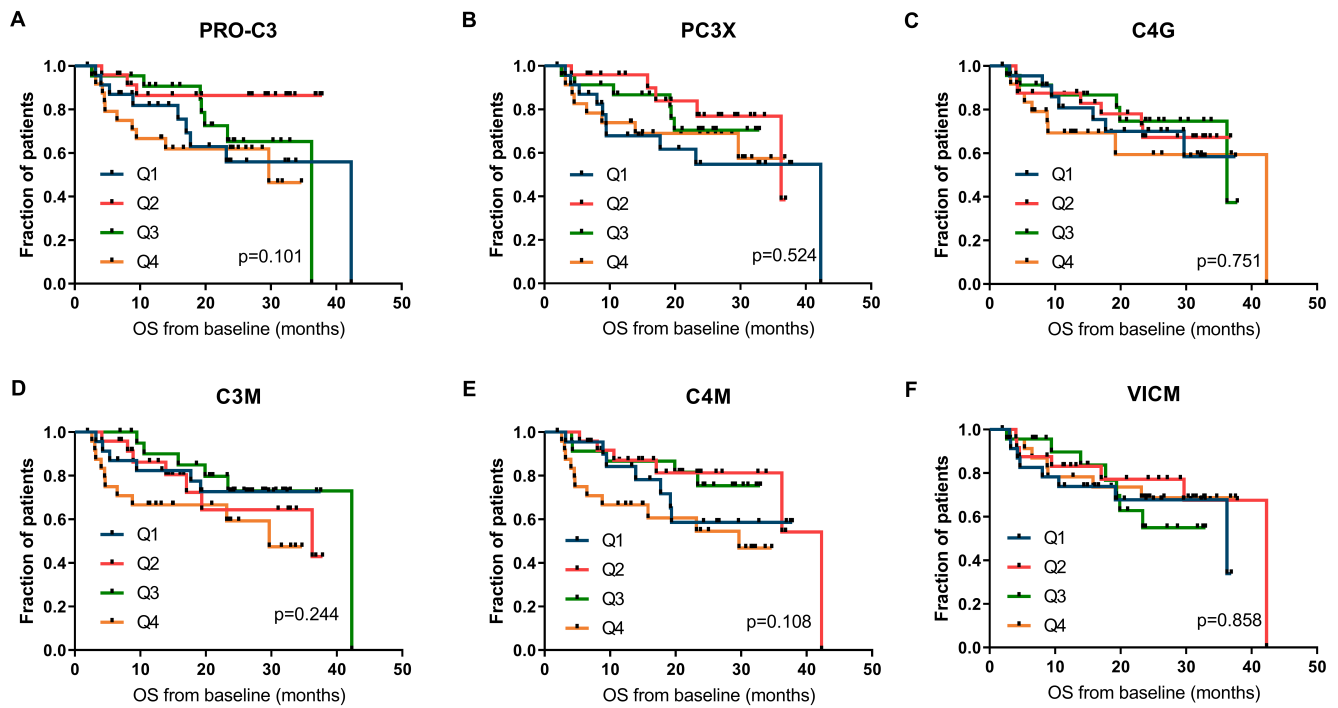

Supplement: jitc-2020-001193supp006.pdf [file jitc-2020-001193supp006.pdf]
